# Supplementary material
Source: PubMed Central journal article supplement (PMC3306833)

# **Supplementary Figure 1**

Bevacizumab reduces the growth rate constants of renal carcinomas. A novel algorithm suggests early discontinuation of bevacizumab resulted in a lack of survival advantage.

Wilfred D. Stein<sup>1,2</sup>

James Yang<sup>3</sup>

Susan E. Bates<sup>1</sup>

Tito Fojo<sup>1,4</sup>

# Patients Randomized to Placebo

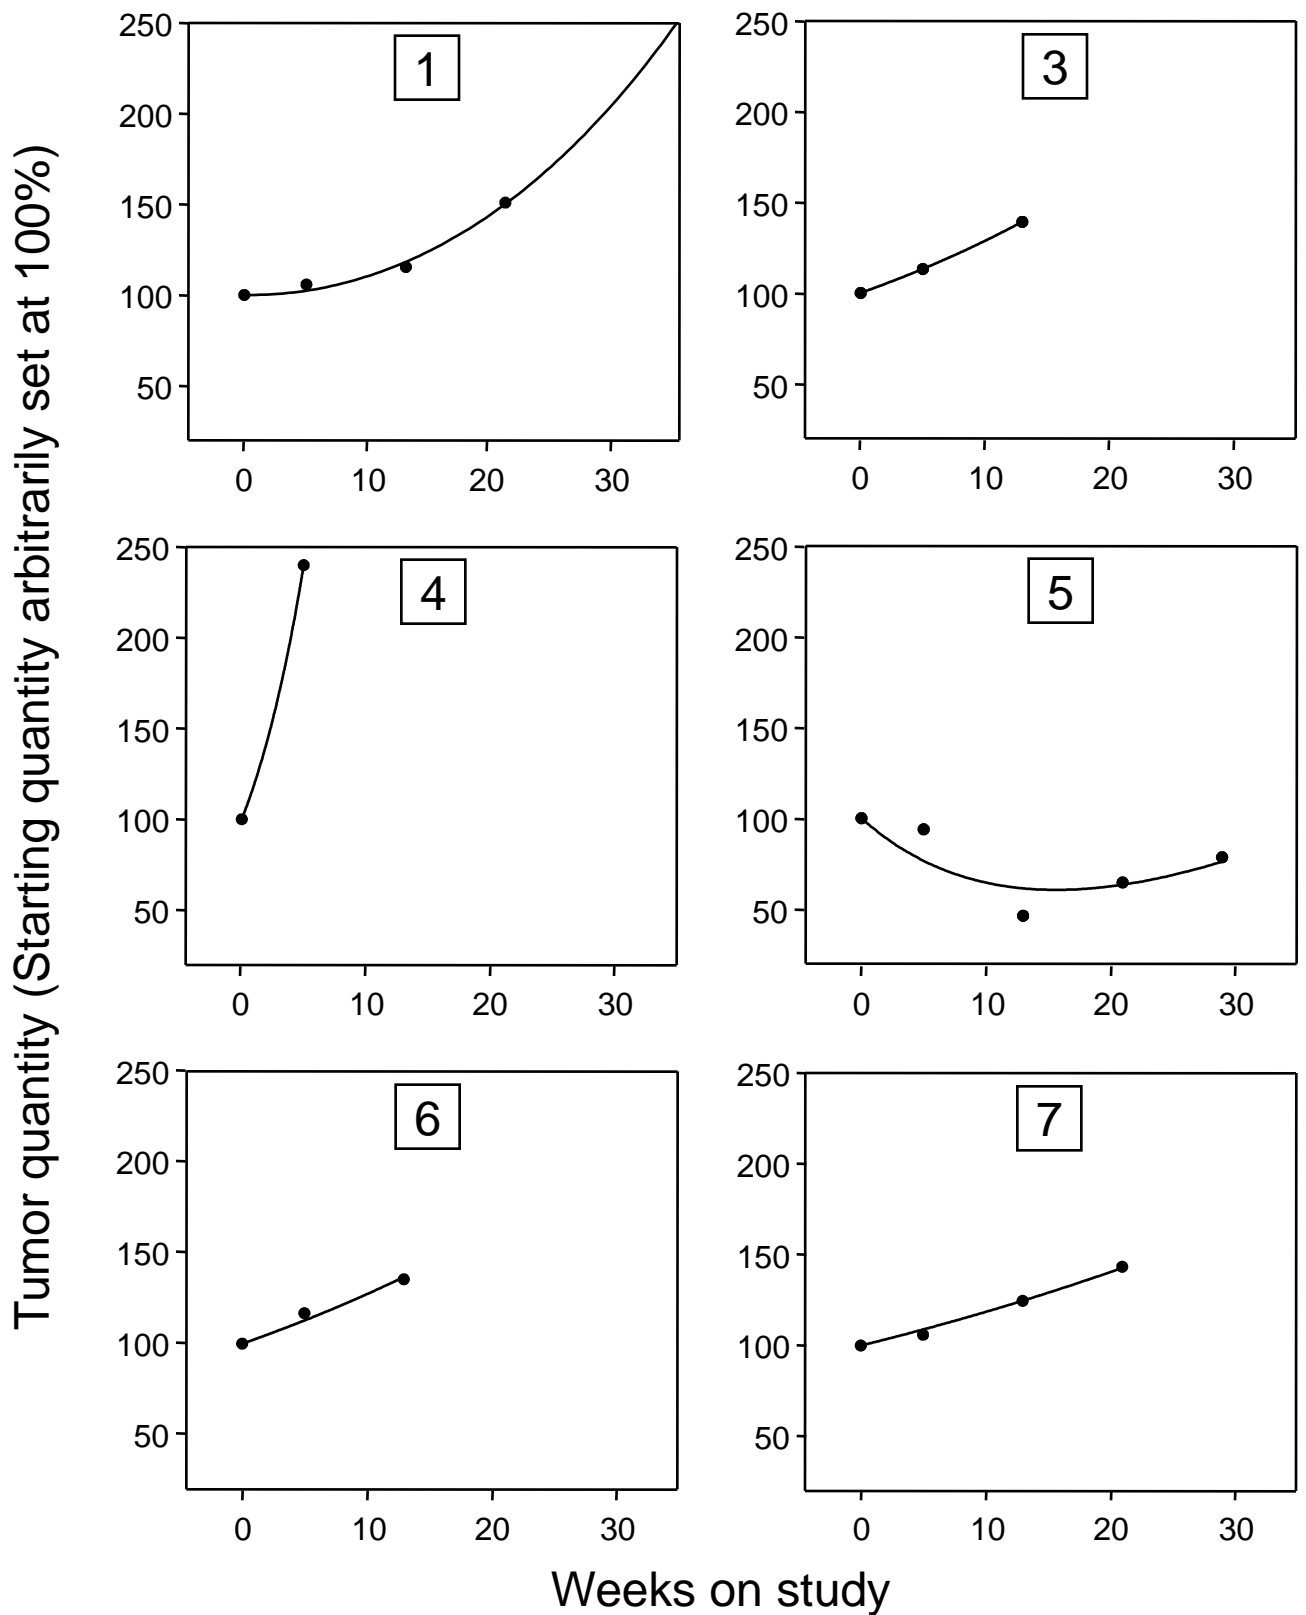

# Patients Randomized to Placebo

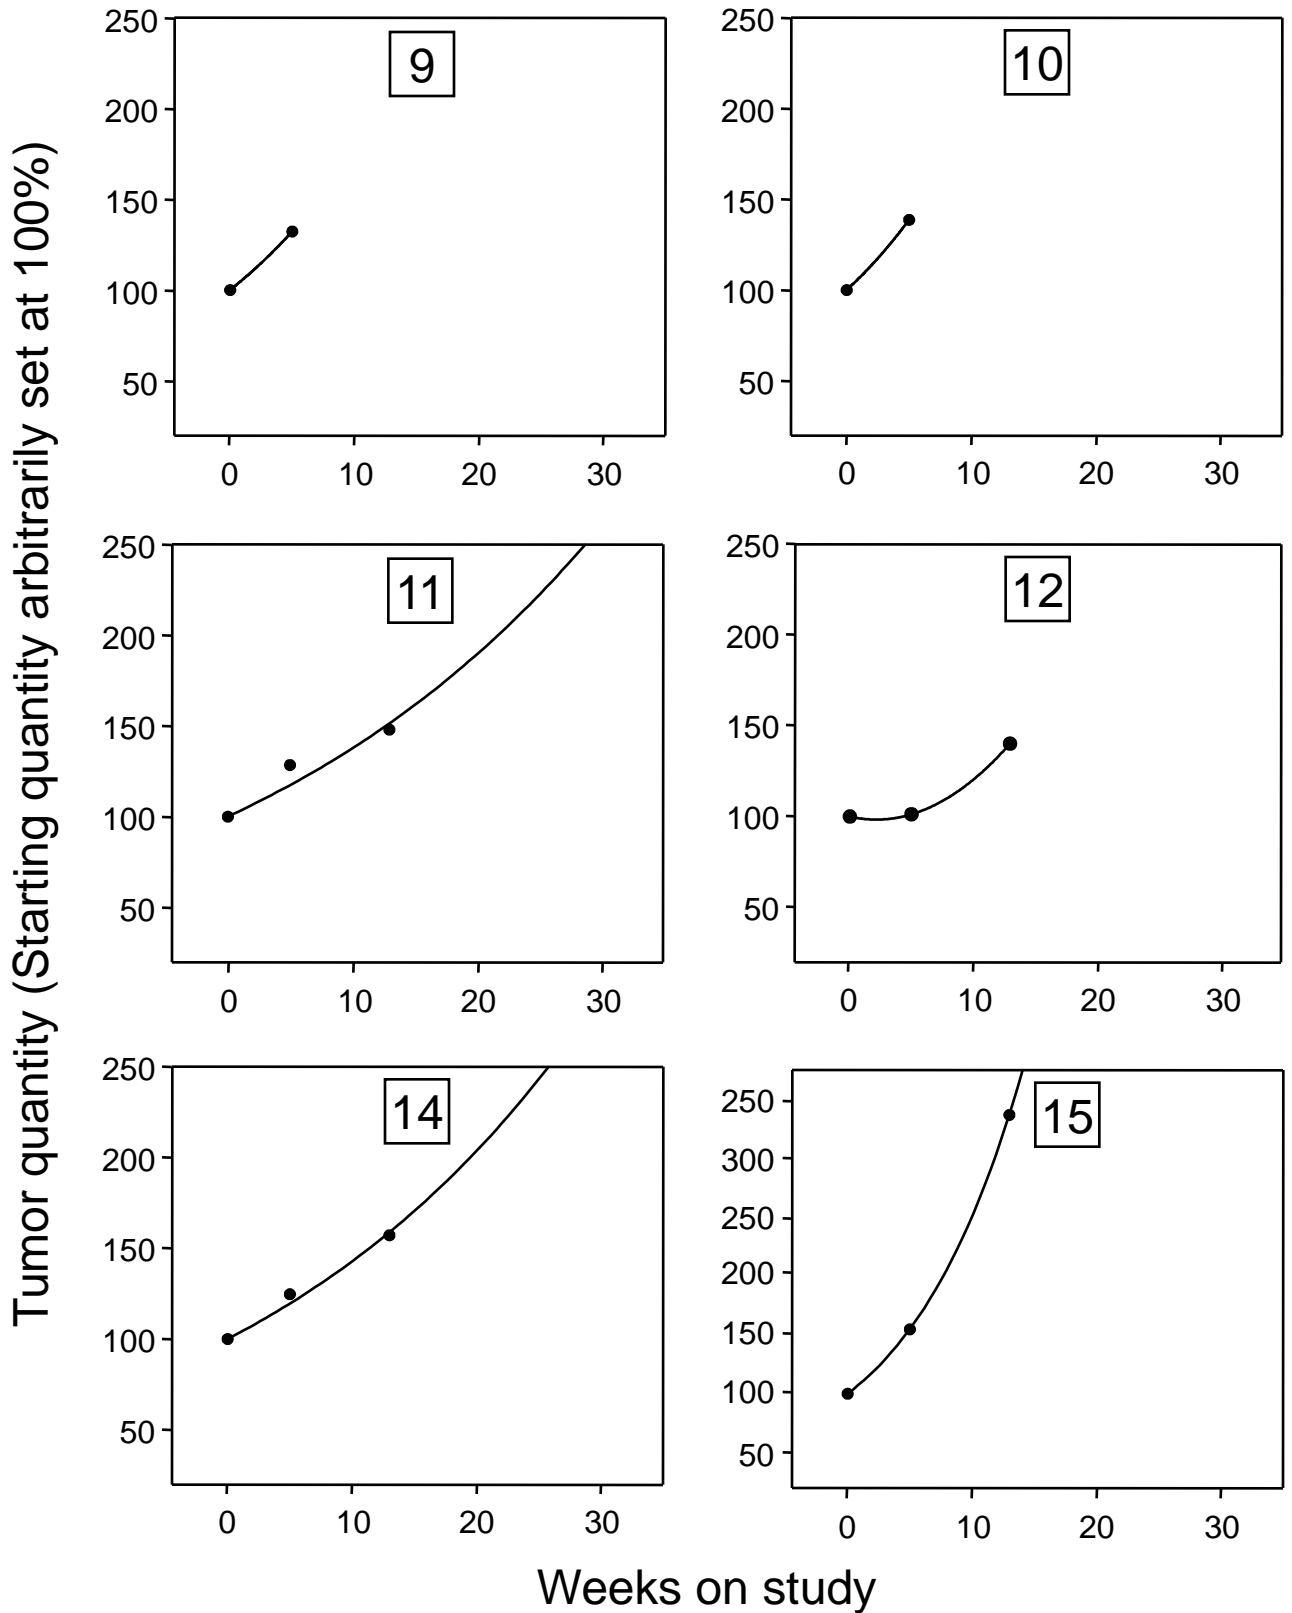

# Patients Randomized to Placebo

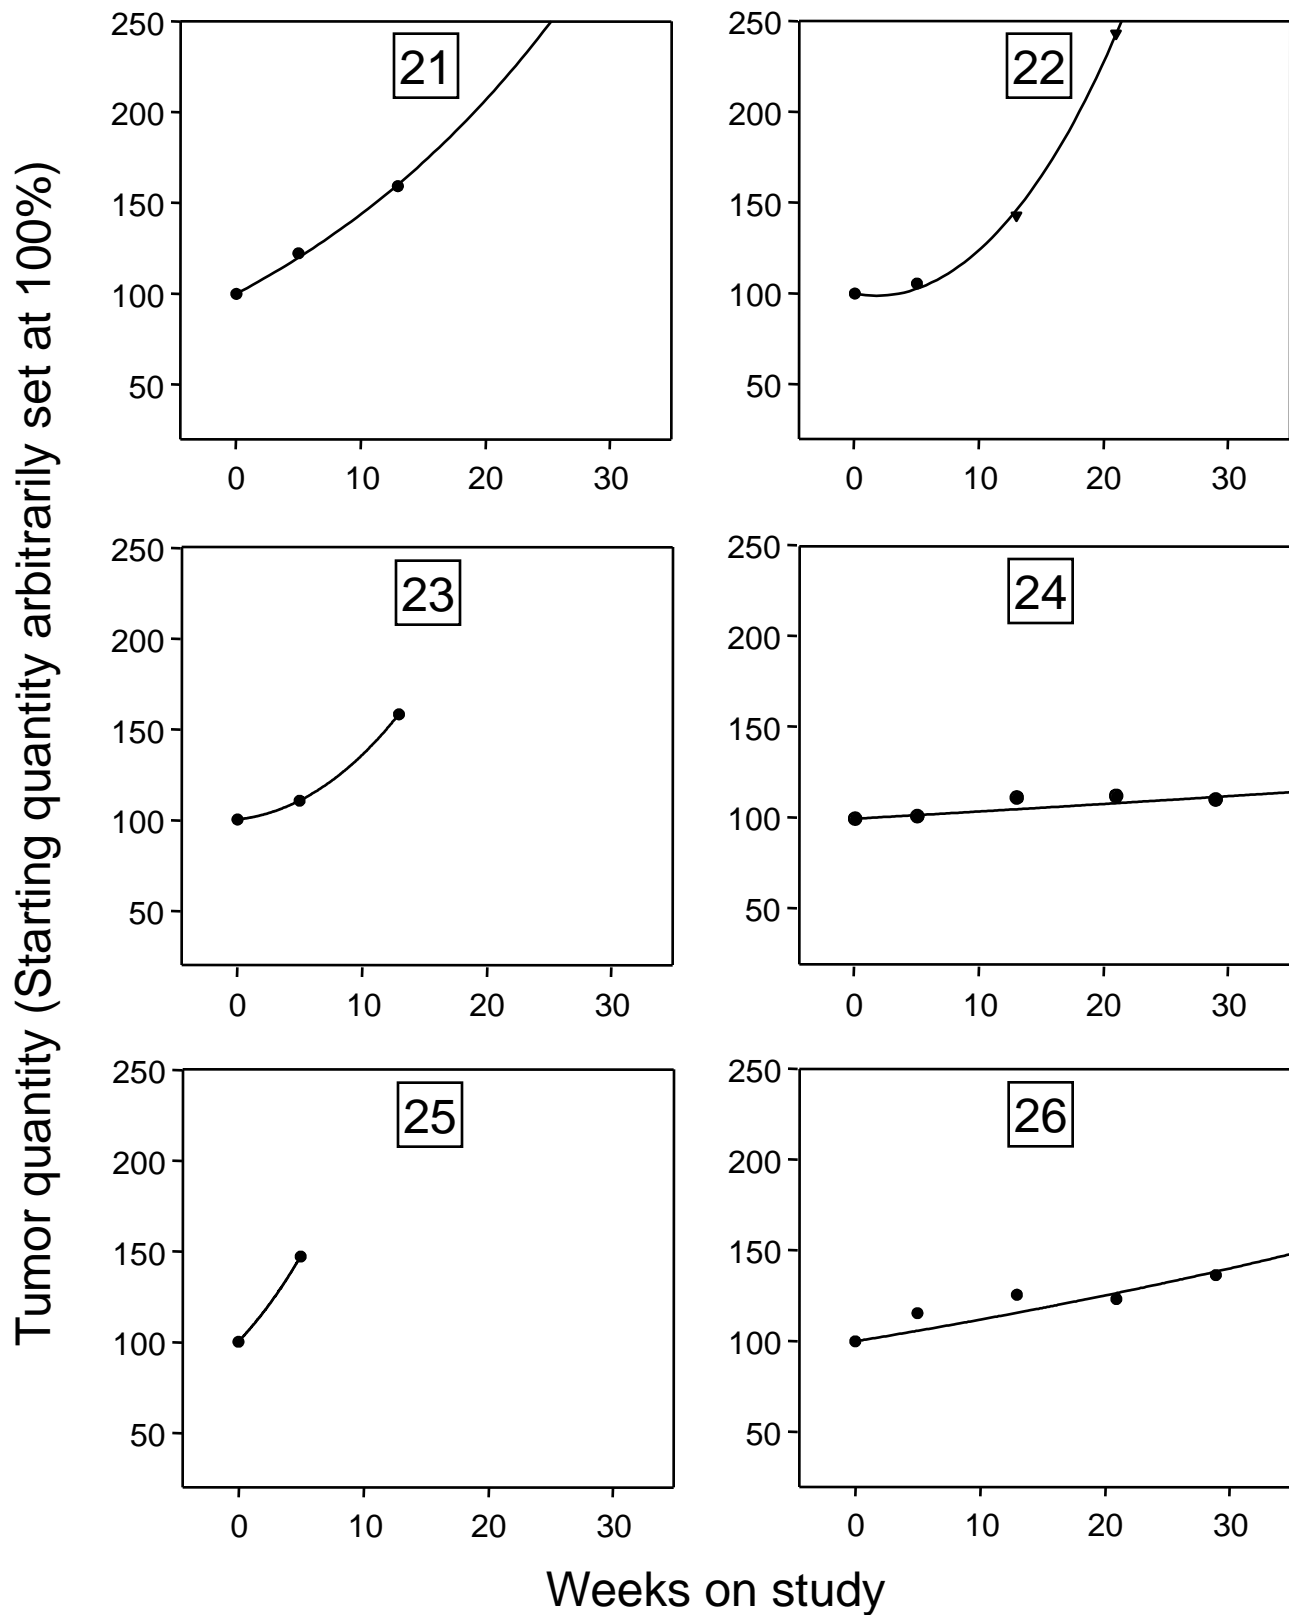

# Patients Randomized to Placebo

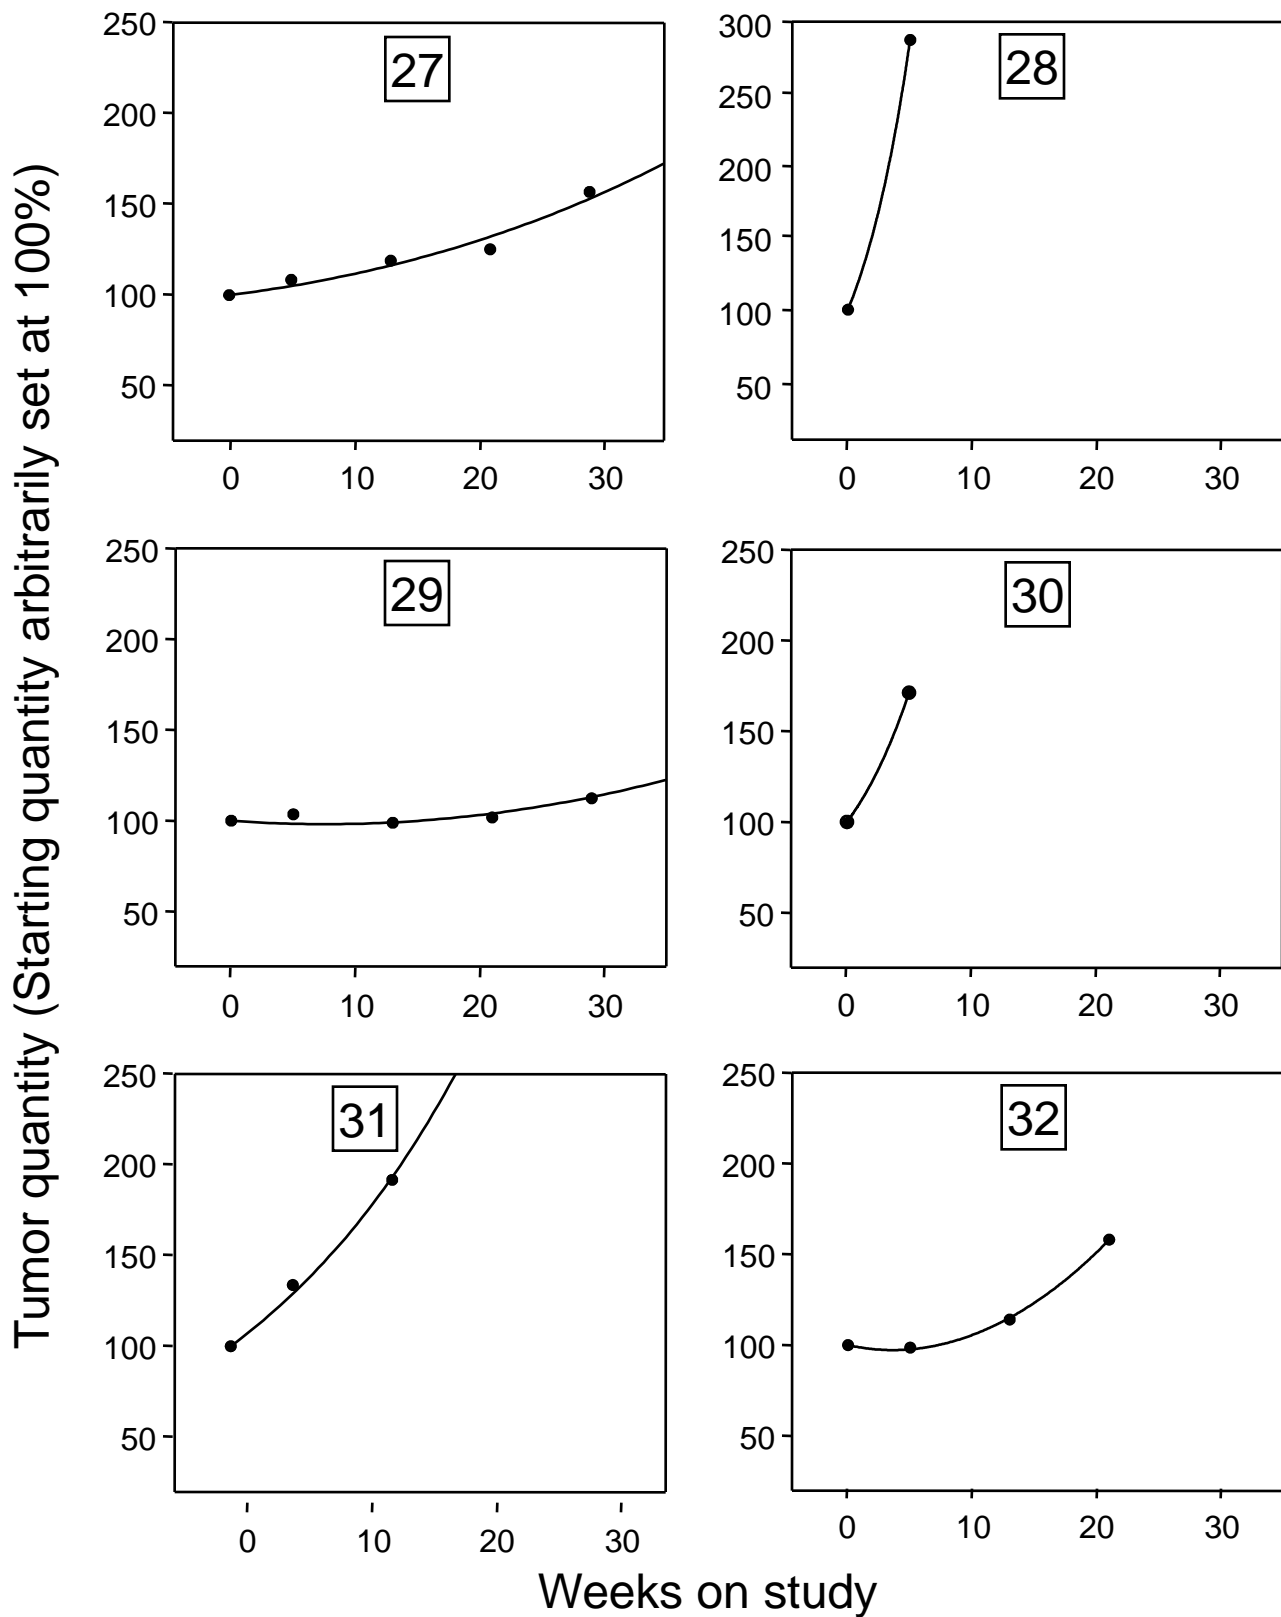

# Patients Randomized to Placebo

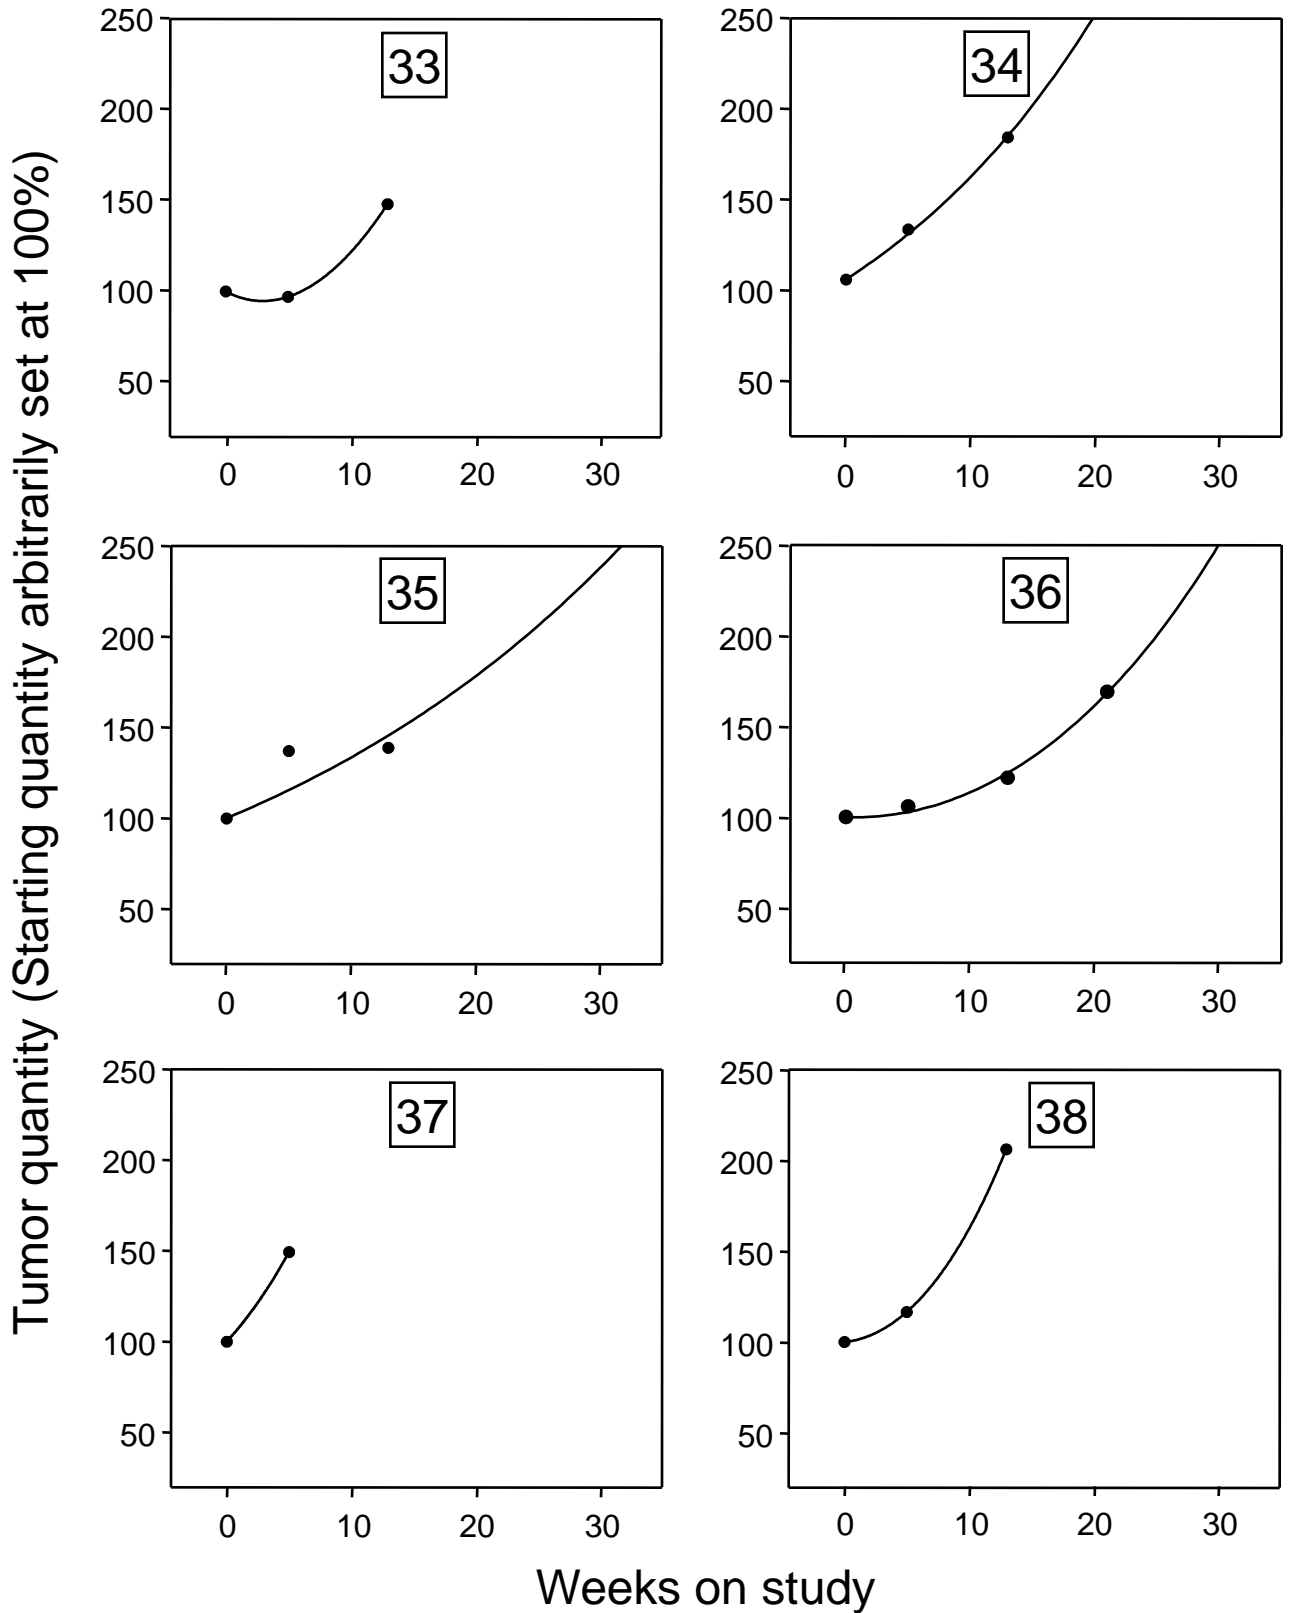

Supplement: NIHMS116971-supplement-Supp__Figure_1.pdf [file NIHMS116971-supplement-Supp__Figure_1.pdf]
