# Supplementary material
Source: PubMed Central journal article supplement (PMC3306833)
Supplement: NIHMS116971-supplement-Supp__Figure_3.pdf [file NIHMS116971-supplement-Supp__Figure_3.pdf]

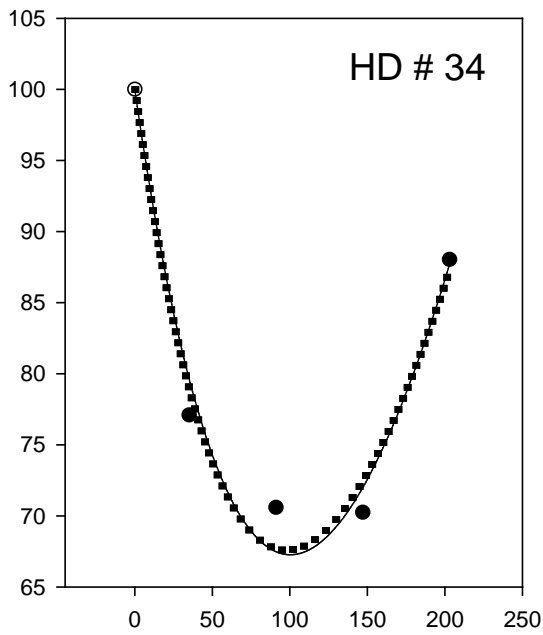

$\Phi$  (sensitive fraction) = 68%

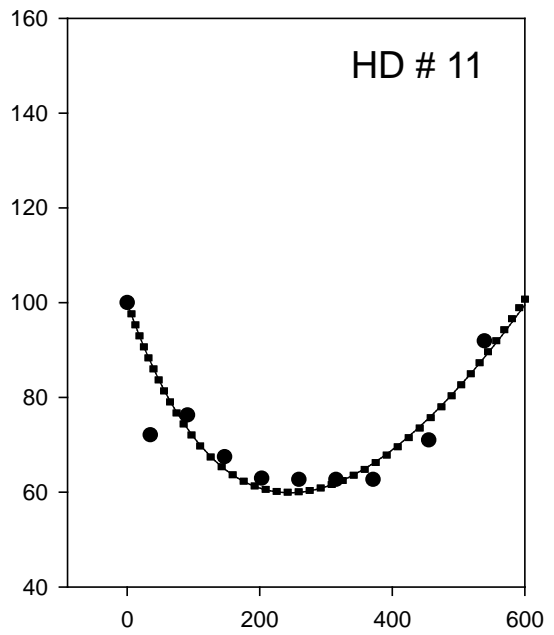

$\Phi$  (sensitive fraction) = 75%

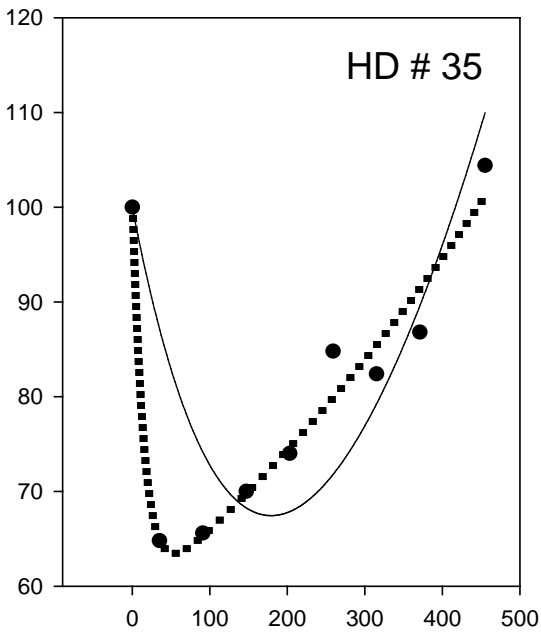

$\Phi$  (sensitive fraction) = 42%

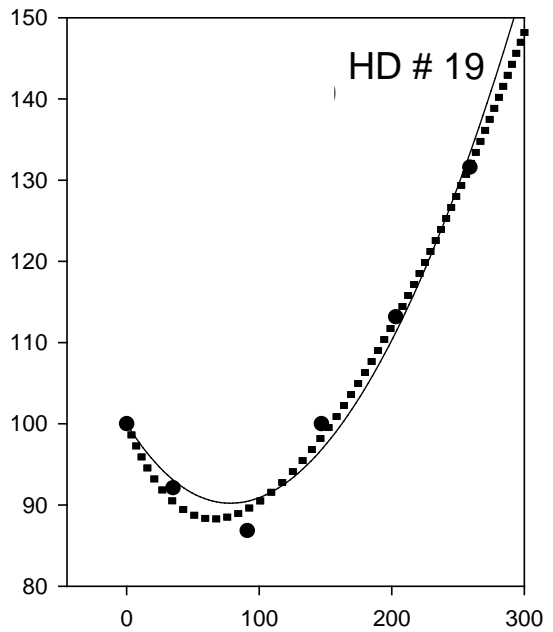

$\Phi$  (sensitive fraction) = 39%
