# Supplementary material
Source: PubMed Central journal article supplement (PMC3306833)

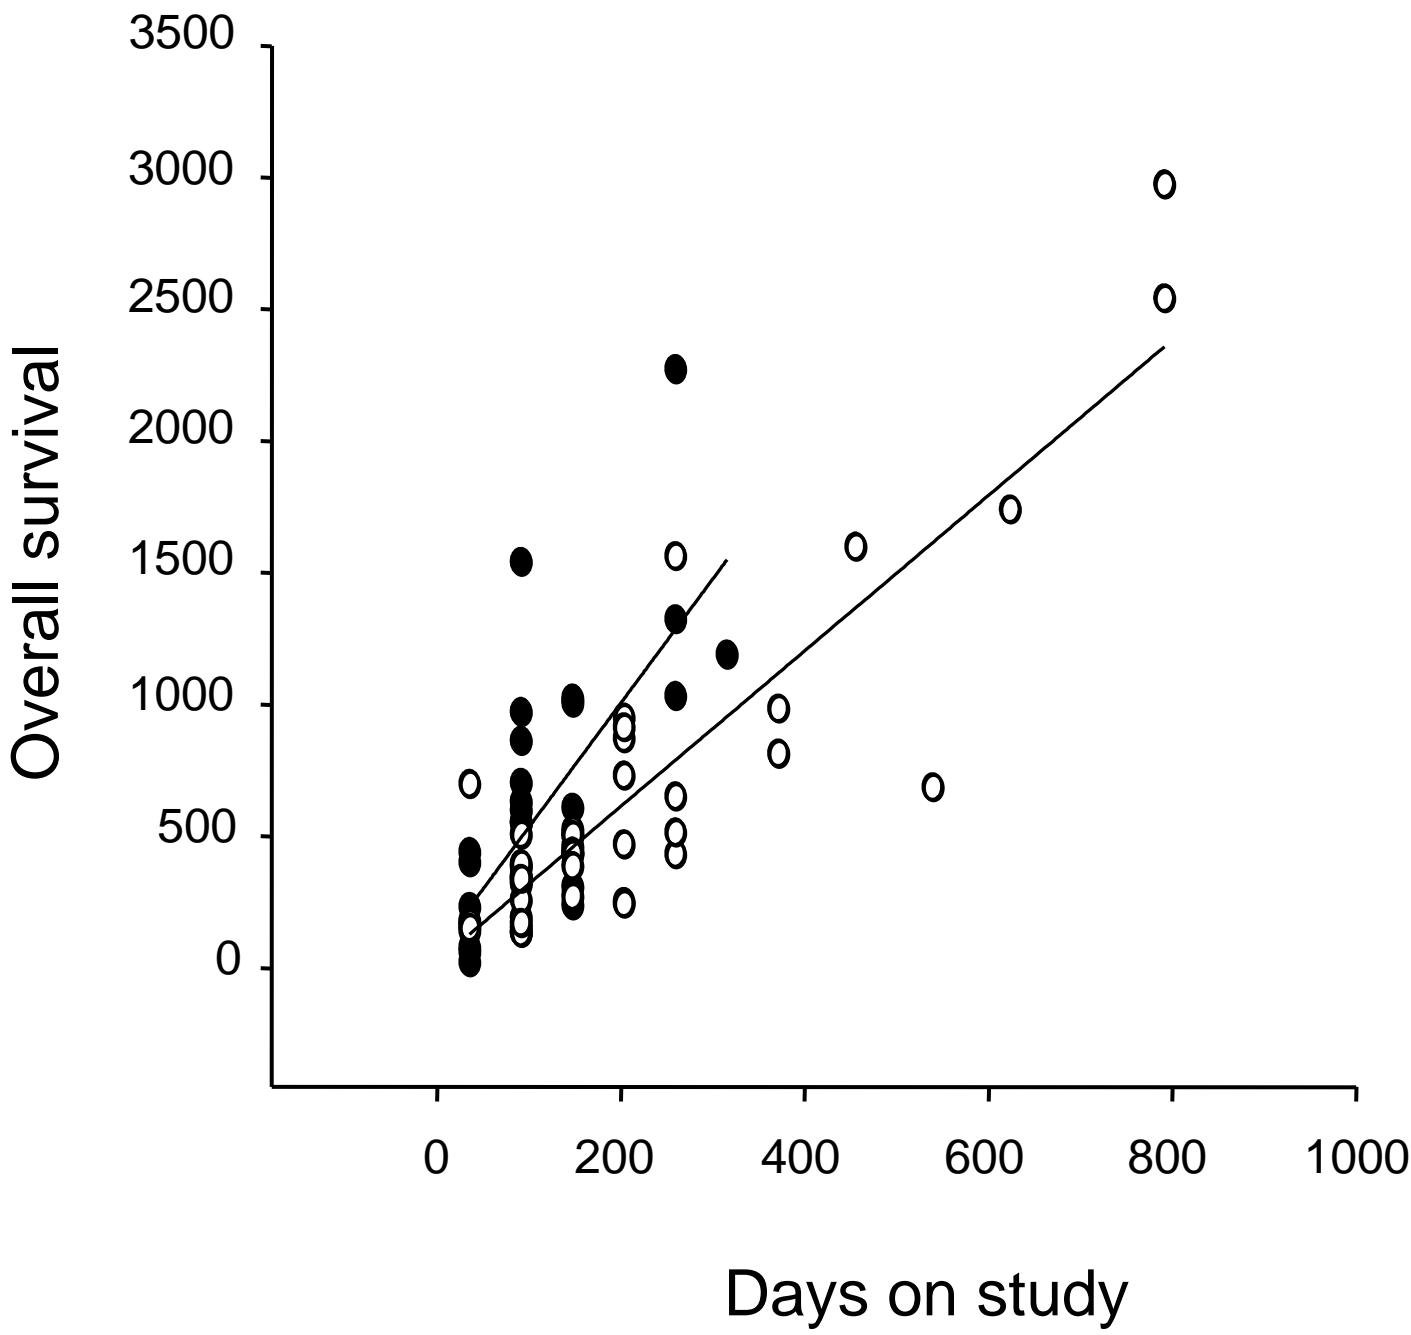

Supplementary Figure 4; Stein, Yang et al.

Supplement: NIHMS116971-supplement-Supp__Figure_4.pdf [file NIHMS116971-supplement-Supp__Figure_4.pdf]

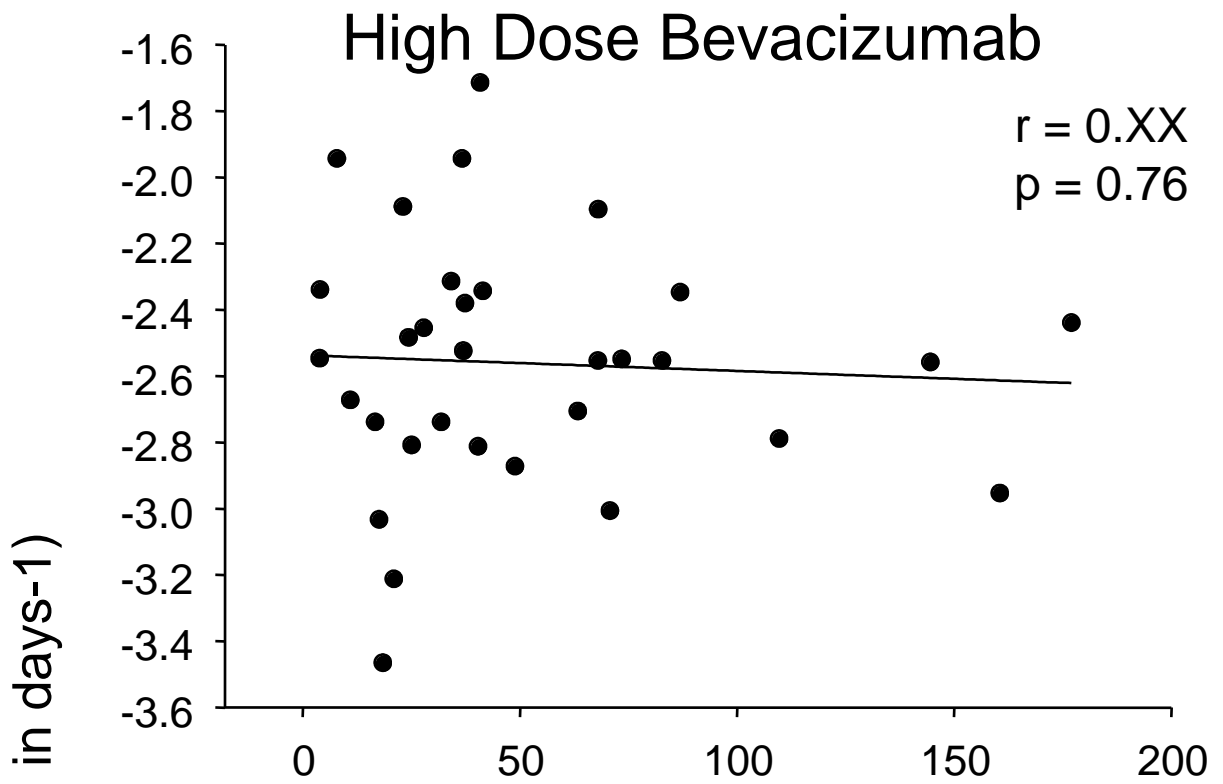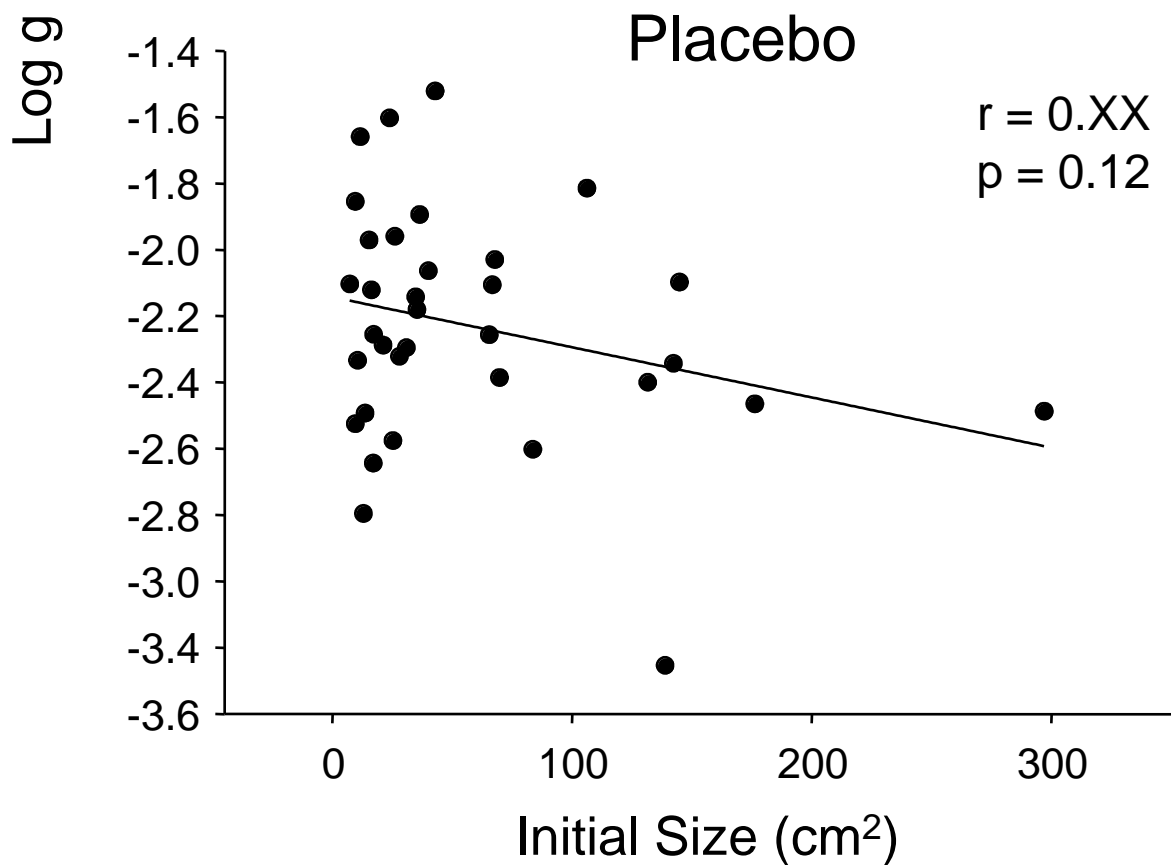

Supplement: NIHMS116971-supplement-Supp__Figure_5.pdf [file NIHMS116971-supplement-Supp__Figure_5.pdf]

## High Dose Bevacizumab

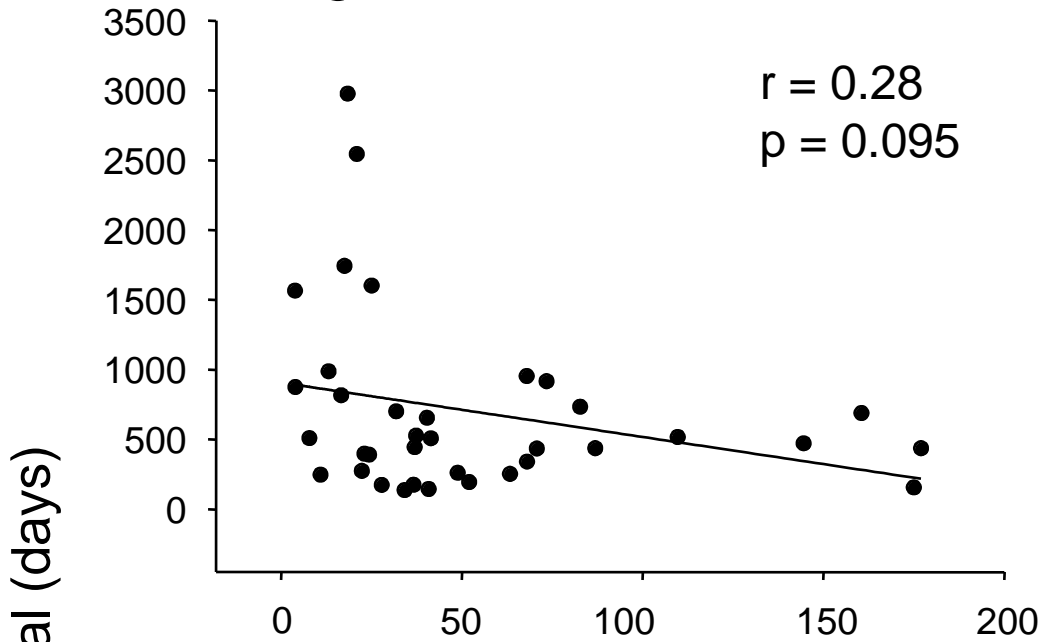

## Placebo

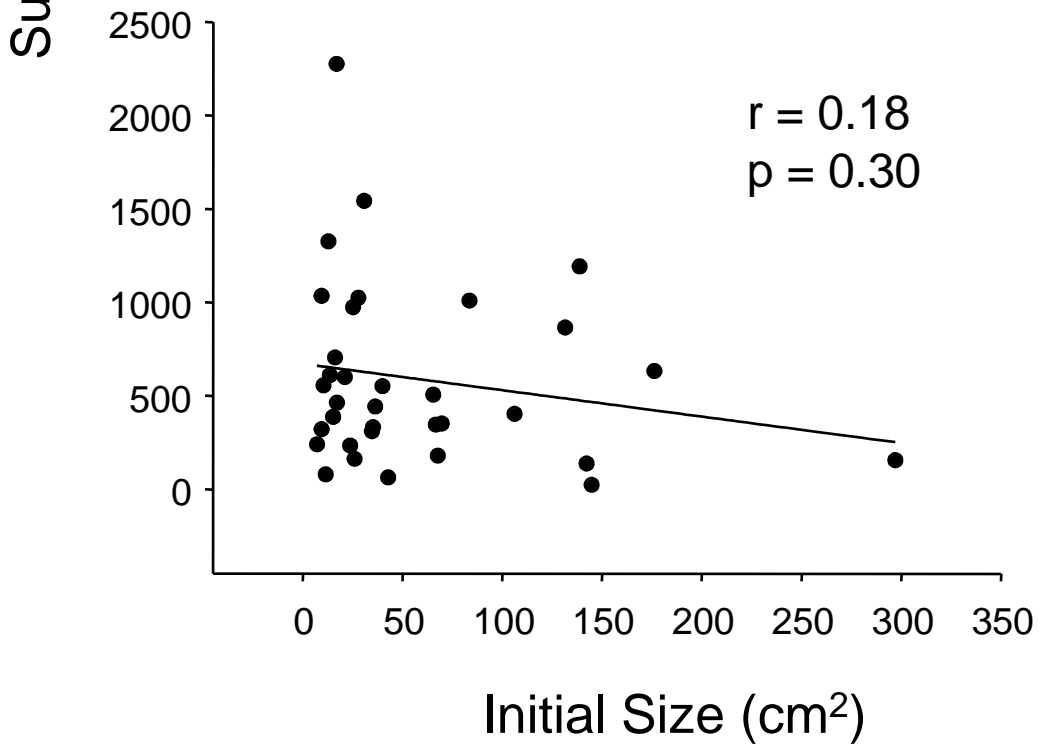

Supplement: NIHMS116971-supplement-Supp__Figure_6.pdf [file NIHMS116971-supplement-Supp__Figure_6.pdf]
